# Supplementary material for: A Web-Based Platform to Support an Evidence-Based Mental Health Intervention: Lessons From the CBITS Web Site
Source: Atypon-hosted journal article supplement (doi:10.1176/appi.ps.201300512), 2014-08-15
Supplement: appi.ps.201300512.ds001.pdf [file appi.ps.201300512.ds001.pdf]

## Website Registrant Characteristics

|                                                                               | N (%) | (%)  |
|-------------------------------------------------------------------------------|-------|------|
| <b>Gender</b>                                                                 |       |      |
| Male                                                                          | 188   | 13.7 |
| Female                                                                        | 1186  | 86.3 |
| <b>Race/Ethnicity</b>                                                         |       |      |
| American Indian/Alaska Native                                                 | 24    | 1.7  |
| Asian                                                                         | 50    | 3.6  |
| Black/African American                                                        | 229   | 16.3 |
| Native Hawaiian/Pacific Islander                                              | 7     | .5   |
| Caucasian                                                                     | 959   | 68.2 |
| Hispanic/Latino(a)                                                            | 177   | 12.6 |
| <b>Highest Degree</b>                                                         |       |      |
| BA/BS                                                                         | 242   | 17.6 |
| MA/MS                                                                         | 939   | 68.2 |
| PhD, PsyD, Ed.D                                                               | 162   | 11.8 |
| MD                                                                            | 12    | .9   |
| Other                                                                         | 21    | 1.5  |
| <b>Have you previously been trained in CBITS?</b>                             |       |      |
| No                                                                            | 1085  | 79   |
| Yes                                                                           | 289   | 21   |
| <b>How much prior experience do you have with CBT?</b>                        |       |      |
| None                                                                          | 93    | 6.7  |
| some training in school/coursework                                            | 492   | 35.6 |
| 1-3 years                                                                     | 386   | 27.9 |
| 4-6 years                                                                     | 136   | 9.8  |
| 6+ years                                                                      | 276   | 20   |
| <b>How many years of experience do you have as a mental health clinician?</b> |       |      |
| 0                                                                             | 154   | 11.4 |
| <1                                                                            | 118   | 8.8  |
| 1-3                                                                           | 274   | 20.4 |
| 4-7                                                                           | 257   | 19.1 |
| 8+                                                                            | 542   | 40.3 |
| <b>What was your primary reason for visiting the website?</b>                 |       |      |
| Become a clinician                                                            | 662   | 47.1 |
| Support work as a clinician                                                   | 376   | 26.7 |
| Better supervise CBITS clinicians                                             | 183   | 13   |
| Better understand CBITS as admin                                              | 255   | 18.1 |
| Access to imp support                                                         | 622   | 44.2 |
